# Supplementary material for: Development and validation of a short and easy-to-use instrument for measuring health literacy: the Health Literacy Instrument for Adults (HELIA)
Source: BMC Public Health. 2020 May 12;20:656. doi: 10.1186/s12889-020-08787-2 (PMC7216550; doi:10.1186/s12889-020-08787-2)
Supplement: Supplementary file 1 — Additional file 1. The HELIA English version. [file 12889_2020_8787_MOESM1_ESM.pdf]

## Health Literacy Instrument for Adults (HELIA)

**Dear respondent,**

This questionnaire deals with your perceived abilities and competencies on obtaining and using health information. For each question, put a check mark or cross in the box in front of the answer that best describes your abilities or skills. Please answer all questions.

| <b>Reading</b>                                                                                                                              | <b>Never</b> | <b>Rarely</b> | <b>Sometimes</b> | <b>Usually</b> | <b>Always</b> |
|---------------------------------------------------------------------------------------------------------------------------------------------|--------------|---------------|------------------|----------------|---------------|
| 1. Reading educational materials about health (booklets, pamphlets, leaflets) is easy for me.                                               | 1            | 2             | 3                | 4              | 5             |
| 2. Reading written instructions from doctors, dentists and health workers about my illness is easy for me.                                  | 1            | 2             | 3                | 4              | 5             |
| 3. Reading medical and dental forms (such as admissions, consent, filing, etc. in hospitals and medical centers) is easy for me.            | 1            | 2             | 3                | 4              | 5             |
| 4. Reading leaflets and instructions for laboratory testing, ultrasound or radiology is easy for me.                                        | 1            | 2             | 3                | 4              | 5             |
| <b>Access to information</b>                                                                                                                | <b>Never</b> | <b>Rarely</b> | <b>Sometimes</b> | <b>Usually</b> | <b>Always</b> |
| 5. I can find health information from different sources when I need such information.                                                       | 1            | 2             | 3                | 4              | 5             |
| 6. I can find health information about healthy eating.                                                                                      | 1            | 2             | 3                | 4              | 5             |
| 7. I can find health information on mental health such as depression and stress.                                                            | 1            | 2             | 3                | 4              | 5             |
| 8. I can find health information about a specific disease when I need to.                                                                   | 1            | 2             | 3                | 4              | 5             |
| 9. I can find health information for some health problems and diseases such as high blood pressure, high blood sugar and high lipid levels. | 1            | 2             | 3                | 4              | 5             |
| 10. I can find health information about harmful effects of tobacco and smoking.                                                             | 1            | 2             | 3                | 4              | 5             |
| <b>Understanding</b>                                                                                                                        | <b>Never</b> | <b>Rarely</b> | <b>Sometimes</b> | <b>Usually</b> | <b>Always</b> |
| 11. I can understand the recommendations for a healthy diet.                                                                                | 1            | 2             | 3                | 4              | 5             |
| 12. I can understand when my physician explains about my illness.                                                                           | 1            | 2             | 3                | 4              | 5             |
| 13. I can understand the meaning when reading medical forms (such as admissions, consents, filings, etc.) in hospitals and health centers.  | 1            | 2             | 3                | 4              | 5             |
| 14. I can understand signage guidelines in hospitals, clinics and health centers.                                                           | 1            | 2             | 3                | 4              | 5             |
| 15. I can understand drug information on labels.                                                                                            | 1            | 2             | 3                | 4              | 5             |

|                                                                                                                                             |              |               |                  |                |               |
|---------------------------------------------------------------------------------------------------------------------------------------------|--------------|---------------|------------------|----------------|---------------|
| 16. I can understand the risks and benefits of drugs prescribed by my physician.                                                            | 1            | 2             | 3                | 4              | 5             |
| 17. I can understand written information before testing, ultrasound or radiology.                                                           | 1            | 2             | 3                | 4              | 5             |
| <b>Appraisal</b>                                                                                                                            | <b>Never</b> | <b>Rarely</b> | <b>Sometimes</b> | <b>Usually</b> | <b>Always</b> |
| 18. I can evaluate health-related information on the Internet.                                                                              | 1            | 2             | 3                | 4              | 5             |
| 19. I can evaluate health-related information broadcast on television and radio.                                                            | 1            | 2             | 3                | 4              | 5             |
| 20. I can assess the accuracy of health-related recommendations I receive from relatives and friends.                                       | 1            | 2             | 3                | 4              | 5             |
| 21. I can communicate trusted health information to others.                                                                                 | 1            | 2             | 3                | 4              | 5             |
| <b>Decision-making/ behavioural intention</b>                                                                                               | <b>Never</b> | <b>Rarely</b> | <b>Sometimes</b> | <b>Usually</b> | <b>Always</b> |
| 22. When facing an illness, I know where to go or with whom to speak.                                                                       | 1            | 2             | 3                | 4              | 5             |
| 23. When physician suggests that I should take antibiotic capsules three times a day, I know that I should take one tablet every 8 hours.   | 1            | 2             | 3                | 4              | 5             |
| 24. I do not cut my medications without my physician's permission, even if symptoms disappear.                                              | 1            | 2             | 3                | 4              | 5             |
| 25. If anyone from my first-degree relatives develops cancer (such as prostate, breast, cervix, colon, etc.), I see a doctor to examine me. | 1            | 2             | 3                | 4              | 5             |
| 26. I avoid doing or eating things that increase my blood pressure.                                                                         | 1            | 2             | 3                | 4              | 5             |
| 27. I visit my physician for regular checkups.                                                                                              | 1            | 2             | 3                | 4              | 5             |
| 28. I am health-conscious in any situation.                                                                                                 | 1            | 2             | 3                | 4              | 5             |
| 29. If needed, I ask my physician or health care team questions about my disease.                                                           | 1            | 2             | 3                | 4              | 5             |
| 30. I buy dairy products (milk, yoghurt, cheese, etc.) according to their fat percentage.                                                   | 1            | 2             | 3                | 4              | 5             |
| 31. I avoid using substances that increase my weight.                                                                                       | 1            | 2             | 3                | 4              | 5             |
| 32. I use a seat belt when driving.                                                                                                         | 1            | 2             | 3                | 4              | 5             |
| 33. I consider the food labels when shopping.                                                                                               | 1            | 2             | 3                | 4              | 5             |

**Thank you for completing the questionnaire**

© Montazeri et.al, 2017

Health Metrics Research Center, Iranian Institute for Health Sciences Research, ACECR, Tehran, Iran.
